# Supplementary material for: Validating the ACOSOG Z0011 Trial Result: A Population-Based Study Using the SEER Database
Source: PubMed Central journal article supplement (PMC7226449; doi:10.3390/cancers12040950), 2020-04-11
Supplement: cancers-12-00950-s001.pdf [file cancers-12-00950-s001.pdf]

## Supplementary Material: Validating the ACOSOG Z0011 Trial Result: A Population-Based Study Using the SEER Database

Jiwoong Jung, Byoung Hyuck Kim, Jongjin Kim, Sohee Oh, Su-jin Kim, Chang-Sup Lim, In Sil Choi and Ki-Tae Hwang

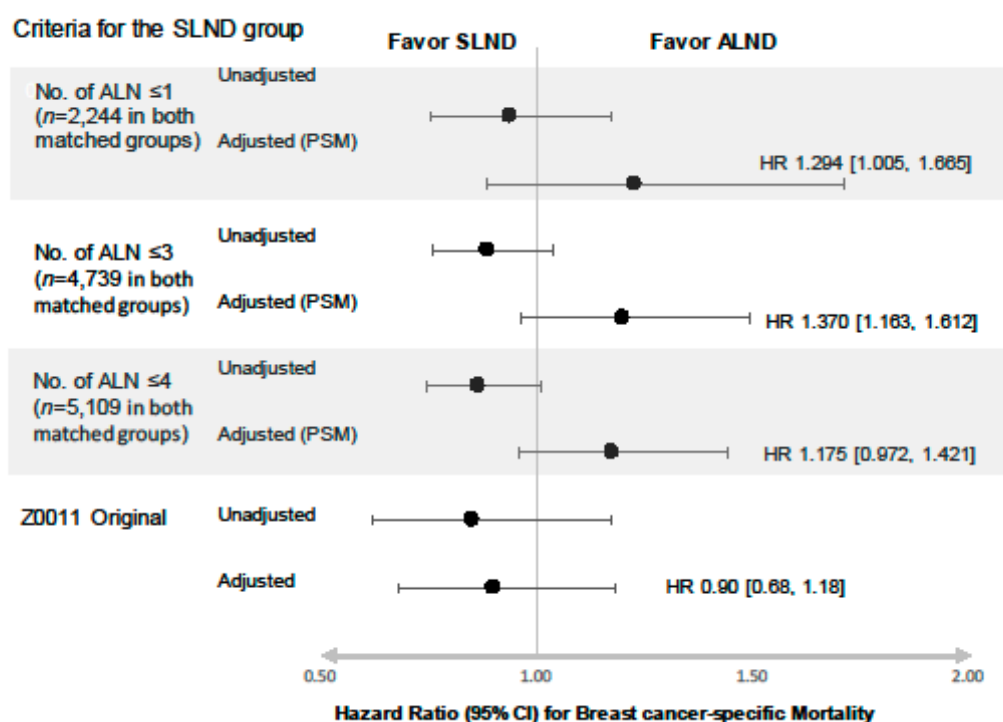

**Figure S1.** Adjusted hazard ratios of the SLND group to the SLND+ALND group, for breast cancer-specific mortality after propensity score matching. Abbreviations: ALND, axillary lymph node dissection; CI, confidence interval; HR, hazard ratio; SLND, sentinel lymph node dissection

**Table S1.** Comparison between the Z0011-comparable cohort in this study and the ACOSOG Z0011 study cohort.

| Characteristics            | Total          | SLND<br>(ALN 1–2) | ACOSOG Z0011<br>(Intention-to-Treat Sample) |            |
|----------------------------|----------------|-------------------|---------------------------------------------|------------|
|                            |                |                   | SLND Alone                                  | ALND       |
|                            | No. (%)        | No. (%)           | No. (%)                                     | No. (%)    |
| Subject number             | 23,138         | 7,077             | 436                                         | 420        |
| Patient age, years (range) | 60 (20–101)    | 62 (23–98)        | 54 (25–90)                                  | 56 (24–92) |
| ≤50                        | 5,227 (22.6)   | 1,300 (18.4)      | 160 (36.7)                                  | 135 (32.1) |
| >50                        | 17,911 (77.4)  | 5,777 (81.6)      | 266 (61.0)                                  | 278 (66.2) |
| missing                    |                |                   | 10                                          | 7          |
| Tumor size, mean (cm)      | 1.8            | 1.8               | 1.6                                         | 1.7        |
| T1                         | 13,674 (59.1)  | 4,448 (62.9)      | 303 (70.6)                                  | 284 (67.9) |
| T2                         | 9,464 (40.9)   | 2,629 (37.1)      | 126 (29.4)                                  | 134 (32.1) |
| N category                 |                |                   |                                             |            |
| N1                         | 23,138 (100.0) | 7,077 (100.0)     | 382 (92.1)                                  | 292 (85.1) |
| N2-3                       |                |                   | 4 (1.0)                                     | 47 (13.7)  |

|                                |               |              |            |            |
|--------------------------------|---------------|--------------|------------|------------|
| missing                        |               |              | 21         | 77         |
| Number of positive SLN         |               |              |            |            |
| 0                              |               |              | 29 (7.0)   | 4 (1.2)    |
| 1                              | 17,677 (76.4) | 6,439 (91.0) | 295 (71.1) | 199 (58.0) |
| 2                              | 5,461 (23.6)  | 638 (9.0)    | 76 (18.3)  | 68 (19.8)  |
| ≥3                             |               |              | 15 (3.6)   | 72 (21.0)  |
| missing                        |               |              | 21         | 77         |
| Histologic grade               |               |              |            |            |
| 1                              | 4,316(18.7)   | 1,536 (21.7) | 81 (25.6)  | 71 (22.0)  |
| 2                              | 10,849 (46.9) | 3,523 (49.8) | 148 (46.8) | 158 (48.9) |
| 3                              | 7,452 (32.2)  | 1,846 (26.1) | 87 (27.5)  | 94 (29.1)  |
| missing                        | 521 (2.3)     | 172 (2.4)    | 120        | 97         |
| ER status                      |               |              |            |            |
| positive                       | 19,927 (86.1) | 6,365 (89.8) | 324 (82.7) | 317 (82.7) |
| borderline                     | 5 (0.0)       | 1 (0.0)      |            |            |
| negative                       | 2,957 (12.8)  | 634 (9.0)    | 68 (17.3)  | 66 (17.3)  |
| missing                        | 249 (1.1)     | 77 (1.1)     | 44         | 37         |
| PR status                      |               |              |            |            |
| positive                       | 17,845 (77.1) | 5,760 (81.4) | 274 (69.9) | 259 (67.6) |
| borderline                     | 26 (0.1)      | 7 (0.1)      |            |            |
| negative                       | 4,982 (21.5)  | 1,224 (17.3) | 118 (30.1) | 124 (32.4) |
| missing                        | 285 (1.2)     | 86 (1.2)     | 44         | 37         |
| Histologic type                |               |              |            |            |
| IDC                            | 18,643 (80.6) | 5,538 (78.3) | 356 (84.0) | 344 (82.7) |
| ILC                            | 1,545 (6.7)   | 562 (7.9)    | 36 (8.5)   | 27 (6.5)   |
| IDC and ILC                    | 1,508 (6.5)   | 510 (7.2)    | -          | -          |
| others                         | 1442 (6.2)    | 467 (6.6)    | 32 (7.5)   | 45 (10.8)  |
| missing                        |               |              | 12         | 4          |
| Adjuvant treatment             |               |              |            |            |
| chemotherapy                   | 13,449 (58.1) | 3,467 (49.0) | 253 (58.0) | 243 (57.9) |
| radiation therapy              | 17,082 (73.8) | 5,299 (74.9) | 277 (89.6) | 263 (88.9) |
| endocrine therapy              |               |              | 203 (46.6) | 195 (46.4) |
| Median follow-up, months (IQR) | 41 (24–61)    | 37 (22–55)   | 75 (62–92) |            |
| Deaths                         |               |              |            |            |
| breast cancer                  | 1760 (7.6)    | 515 (7.3)    | 42 (9.6)   | 52 (12.4)  |
| other cause                    | 865 (3.7)     | 219 (3.1)    |            |            |
|                                | 895 (3.9)     | 296 (4.2)    |            |            |

Abbreviations: ALND, axillary lymph node dissection; ER, estrogen receptor; IDC, invasive ductal carcinoma; ILC, invasive lobular carcinoma; PR, progesterone receptor; SLN, sentinel lymph node; SLND, sentinel lymph node dissection

**Table S2.** Standardized differences before and after propensity score matching for the Z0011-comparable cohort.

| Variables                         | Before Matching |                 | SD      | After Matching |                 | SD      |
|-----------------------------------|-----------------|-----------------|---------|----------------|-----------------|---------|
|                                   | SLND +<br>ALND  | SLND            |         | SLND +<br>ALND | SLND            |         |
|                                   | (N = 6,196)     | (N =<br>6,655)  |         | (N = 3,597)    | (N = 3,597)     |         |
| <b>Age</b>                        |                 |                 | 0.0862  |                |                 | -0.0033 |
| >50                               | 1666 (26.9%)    | 1216<br>(18.3%) |         | 739 (20.5%)    | 751 (20.9%)     |         |
| ≤50                               | 4530 (73.1%)    | 5439<br>(81.7%) |         | 2858 (79.5%)   | 2846<br>(79.1%) |         |
| <b>Histologic type</b>            |                 |                 | 0.0535  |                |                 | 0.0078  |
| IDC                               | 5135 (82.9%)    | 5240<br>(78.7%) |         | 3016 (83.8%)   | 3006<br>(83.6%) |         |
| ILC                               | 301 (4.9%)      | 506<br>(7.6%)   |         | 201 (5.6%)     | 203 (5.6%)      |         |
| IDC and ILC                       | 357 (5.8%)      | 488<br>(7.3%)   |         | 195 (5.4%)     | 193 (5.4%)      |         |
| Others                            | 403 (6.5%)      | 421<br>(6.3%)   |         | 185 (5.1%)     | 195 (5.4%)      |         |
| <b>Histologic grade</b>           |                 |                 | -0.2283 |                |                 | -0.0081 |
| 1                                 | 910 (14.7%)     | 1492<br>(22.4%) |         | 622 (17.3%)    | 627 (17.4%)     |         |
| 2                                 | 2707 (43.7%)    | 3398<br>(51.1%) |         | 1768 (49.2%)   | 1787<br>(49.7%) |         |
| 3                                 | 2579 (41.6%)    | 1765<br>(26.5%) |         | 1207 (33.6%)   | 1183<br>(32.9%) |         |
| <b>T category</b>                 |                 |                 | -0.0882 |                |                 | 0.0053  |
| T1                                | 3359 (54.2%)    | 4195<br>(63.0%) |         | 2125 (59.1%)   | 2106<br>(58.5%) |         |
| T2                                | 2837 (45.8%)    | 2460<br>(37.0%) |         | 1472 (40.9%)   | 1491<br>(41.5%) |         |
| <b>Adjuvant radiation therapy</b> |                 |                 | 0.0298  |                |                 | 0.0025  |
| No                                | 1682 (27.1%)    | 1608<br>(24.2%) |         | 926 (25.7%)    | 917 (25.5%)     |         |
| Yes                               | 4514 (72.9%)    | 5047<br>(75.8%) |         | 2671 (74.3%)   | 2680<br>(74.5%) |         |
| <b>Node status</b>                |                 |                 | 0.2798  |                |                 | 0.0011  |
| macrometastasis                   | 5440 (87.8%)    | 3981<br>(59.8%) |         | 2995 (83.3%)   | 2991<br>(83.2%) |         |
| micrometastasis                   | 756 (12.2%)     | 2674<br>(40.2%) |         | 602 (16.7%)    | 606 (16.8%)     |         |
| <b>Adjuvant chemotherapy</b>      |                 |                 | -0.2102 |                |                 | 0.0011  |
| No                                | 1840 (29.7%)    | 3375<br>(50.7%) |         | 1310 (36.4%)   | 1306<br>(36.3%) |         |
| Yes                               | 4356 (70.3%)    | 3280<br>(49.3%) |         | 2287 (63.6%)   | 2291<br>(63.7%) |         |

|                     |              |              |              |              |         |
|---------------------|--------------|--------------|--------------|--------------|---------|
| No. of Positive ALN |              |              | -0.2715      |              | 0.0017  |
| 1                   | 3945 (63.7%) | 6044 (90.8%) | 3077 (85.5%) | 3071 (85.4%) |         |
| 2                   | 2251 (36.3%) | 611 (9.2%)   | 520 (14.5%)  | 526 (14.6%)  |         |
| ER status           |              |              | 0.0891       |              | -0.0011 |
| Negative            | 1108 (17.9%) | 597 (9.0%)   | 433 (12.0%)  | 437 (12.1%)  |         |
| Positive            | 5088 (82.1%) | 6058 (91.0%) | 3164 (88.0%) | 3160 (87.9%) |         |
| PR status           |              |              | 0.1083       |              | -0.0058 |
| Negative            | 1749 (28.2%) | 1158 (17.4%) | 729 (20.3%)  | 750 (20.9%)  |         |
| Positive            | 4447 (71.8%) | 5497 (82.6%) | 2868 (79.7%) | 2847 (79.1%) |         |
| HER2 status         |              |              | -0.0582      |              | -0.0131 |
| Negative            | 5203 (84.0%) | 5976 (89.8%) | 3170 (88.1%) | 3217 (89.4%) |         |
| Positive            | 993 (16.0%)  | 679 (10.2%)  | 427 (11.9%)  | 380 (10.6%)  |         |

Abbreviations: ALN, axillary lymph node; ALND, axillary lymph node dissection; ER, estrogen receptor; HER2, human epidermal growth factor receptor 2; IDC, invasive ductal carcinoma; ILC, invasive lobular carcinoma; PR, progesterone receptor; SD, standardized difference; SLND, sentinel lymph node dissection

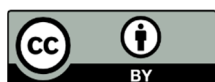

© 2020 by the authors. Licensee MDPI, Basel, Switzerland. This article is an open access article distributed under the terms and conditions of the Creative Commons Attribution (CC BY) license (<http://creativecommons.org/licenses/by/4.0/>).
